# Supplementary material
Source: PubMed Central journal article supplement (PMC4044862)

**Supplemental Fig S4:** *In-vitro* oxidation of ICHO. Protein extracts from rosette leaves of Col-0, *aao1* T-DNA insertion mutant and *35S:AAO1* were prepared and analysed for ICHO oxidase activity. Relative activity to Col-0 is shown for three independent biological replicates.

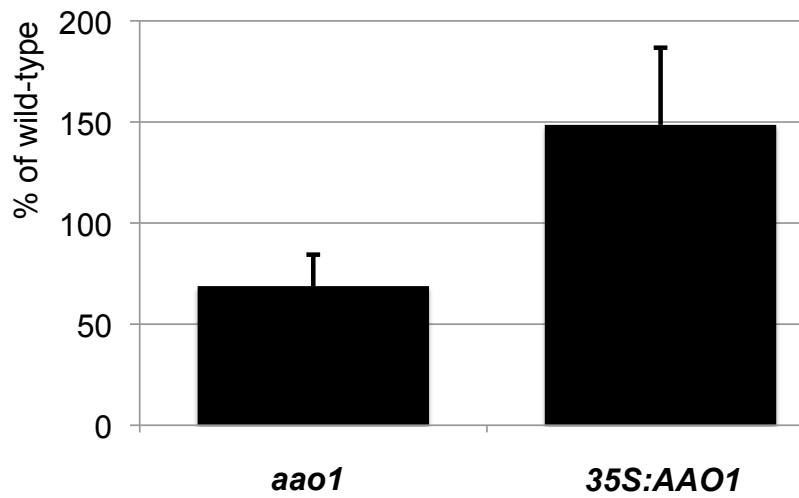

Supplement: supp_pp.114.235630_235630Fig_S4.pdf [file supp_pp.114.235630_235630Fig_S4.pdf]
